# Supplementary material for: LC–HRMS for the Identification of Quercetin and Its Derivatives in Spiraea hypericifolia (Rosaceae) and Anatomical Features of Its Leaves
Source: MDPI journal article supplement (doi:10.3390/plants12020381), 2023-01-13
Supplement: s1 [file s1]

## Supplementary Material

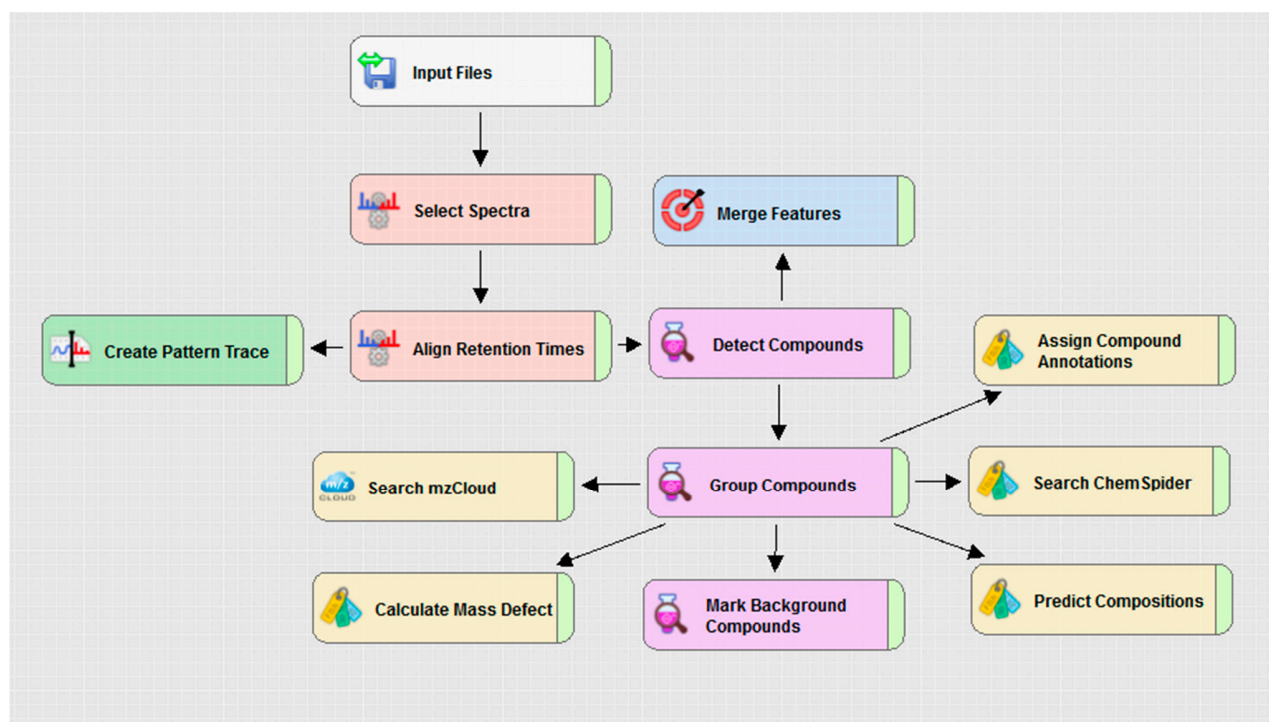

**Figure S1.** Workflow on Compound Discoverer used for flavonoid identification
